# Supplementary material for: Intersurgeon Variability in Local Treatment Planning for Patients with Initially Unresectable Colorectal Cancer Liver Metastases: Analysis of the Liver Expert Panel of the Dutch Colorectal Cancer Group
Source: PubMed Central journal article supplement (PMC10409679; doi:10.1245/s10434-023-13510-7), 2023-04-28
Supplement: 10434_2023_13510_MOESM1_ESM.pdf [file 10434_2023_13510_MOESM1_ESM.pdf]

**Figure S1: The degree of agreement among surgeons per individual patient in resectability evaluations per evaluation moment.** Minor disagreement = combination of potentially resectable and resectable, or potentially resectable and permanently unresectable. Major disagreement =  $\geq 1$  resectable and  $\geq 1$  permanently unresectable.

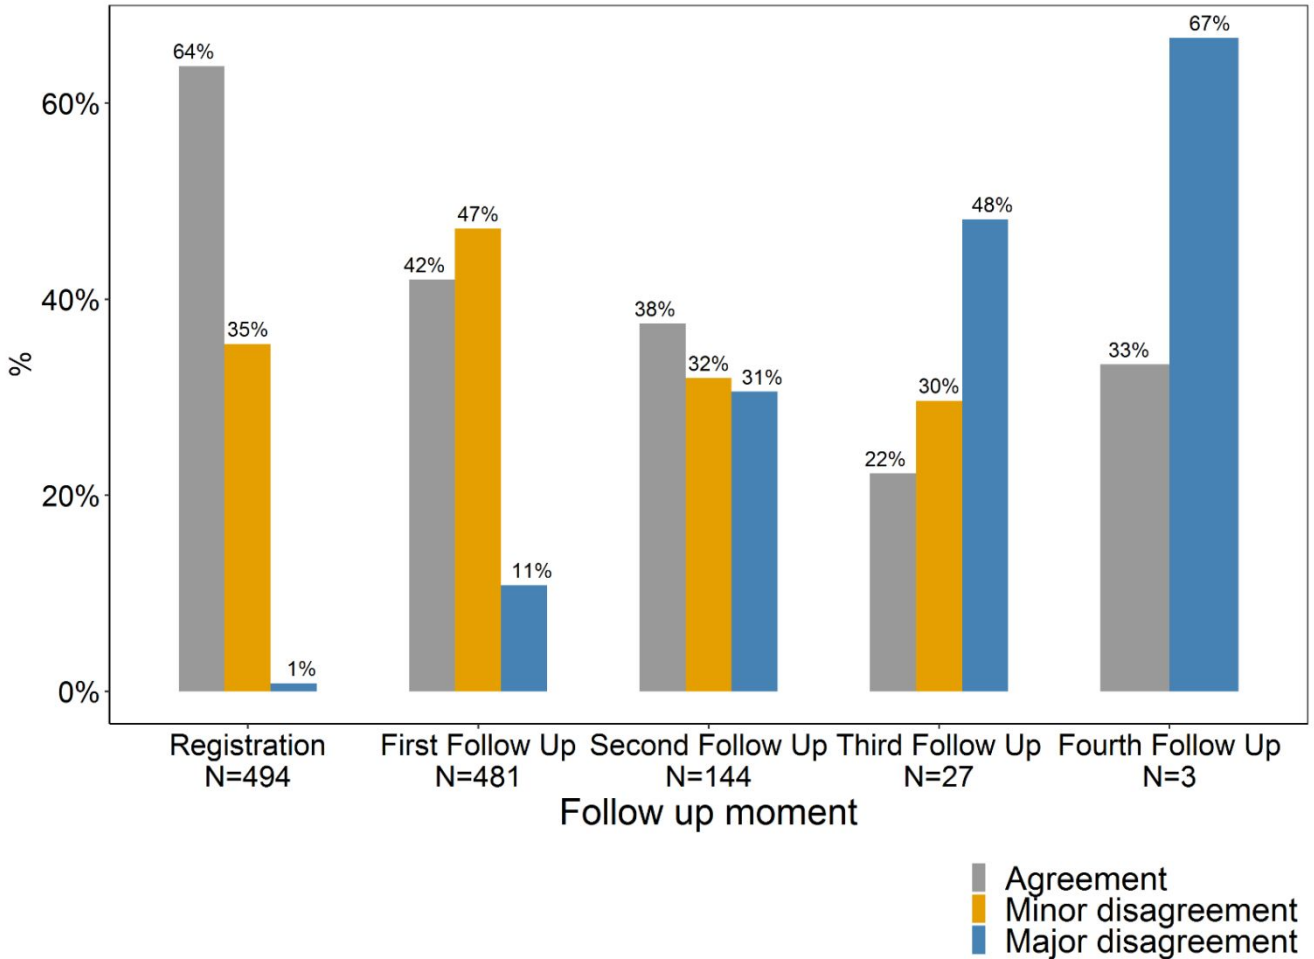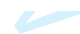

**Figure S2: The degree of agreement among surgeons per individual patient in resectability evaluations over time.** Patients were divided into six chronological groups to show the variability over time. Minor disagreement = combination of potentially resectable and resectable, or potentially resectable and permanently unresectable. Major disagreement =  $\geq 1$  resectable and  $\geq 1$  permanently unresectable.

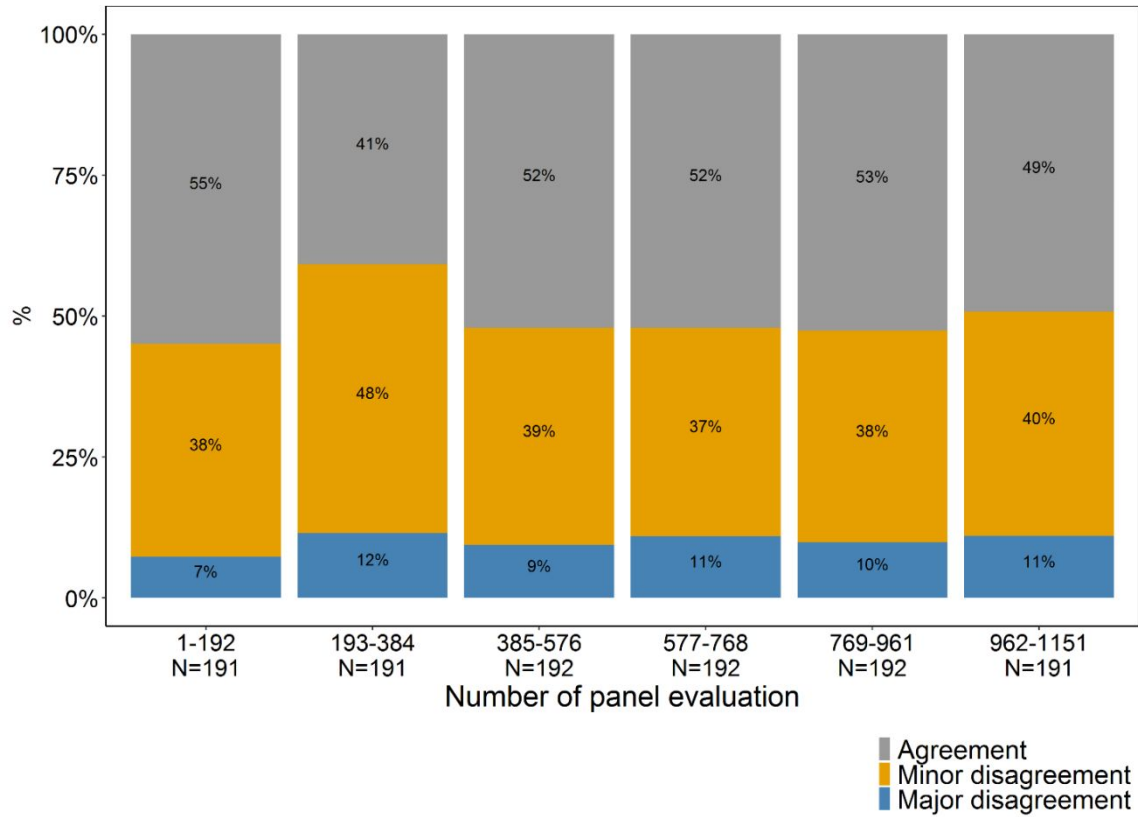

**Table S1: Type of local treatment in patients who received complete local treatment.**

|                                                                                                                                   | N=235      |
|-----------------------------------------------------------------------------------------------------------------------------------|------------|
| (Extended) hemihepatectomy                                                                                                        | 23 (9.8%)  |
| (Extended) hemihepatectomy + (combination of) local resection/ablation                                                            | 30 (12.8%) |
| Two stage: 1. ablation 2. (extended) hemihepatectomy                                                                              | 2 (0.9%)   |
| Two stage: 1. wedge resection 2. (extended) hemihepatectomy                                                                       | 21 (8.9%)  |
| Two stage: 1. segmental resection 2. (extended) hemihepatectomy                                                                   | 2 (0.9%)   |
| Two stage: 1. combination of local resection/ablation 2. (extended) hemihepatectomy                                               | 9 (3.8%)   |
| Two stage: 1. (combination of) local resection/ablation 2. (extended) hemihepatectomy + (combination of) local resection/ablation | 9 (3.8%)   |
| Ablation                                                                                                                          | 9 (3.8%)   |
| Segmental resection                                                                                                               | 9 (3.8%)   |
| Wedge resection                                                                                                                   | 17 (7.2%)  |
| Combination of local resection/ablation                                                                                           | 96 (40.9%) |
| Two stage: 1. (combination of) local resection/ablation 2. (combination of) local resection/ablation                              | 6 (2.6%)   |
| Three stage procedure                                                                                                             | 2 (0.9%)   |

Local resection = wedge resection and/or segmental resection.
